# Supplementary material for: Development, Validation and Comparison of Artificial Neural Network Models and Logistic Regression Models Predicting Survival of Unresectable Pancreatic Cancer
Source: Front Bioeng Biotechnol. 2020 Mar 13;8:196. doi: 10.3389/fbioe.2020.00196 (PMC7082923; doi:10.3389/fbioe.2020.00196)
Supplement: Supplementary file 1 [file Data_Sheet_1.xlsx]

## Sheet: supplementary table
Supplementary table 1. Univariate and multivariate analyses of clinical characteristics associated with 4-month progression free survival of the training group of 168 patients
		Univariate analysis			Multivariate analysis
variables		HR	95% C.I.	p	HR	95% C.I.	p
age, years		1.019	0.983-1.057	0.296
gender	male	1
	female	1.225	0.649-2.312	0.532
main vascular invasion		1.802	0.961-3.381	0.066
T	T1-T2	1
	T3-T4	0.934	0.459-1.9	0.85
N	N0	1
	N1	0.759	0.334-1.725	0.51
M	M0	1
	M1	0.364	0.096-1.375	0.136
retroperitoneal lymph node metastasis		0.844	0.455-1.564	0.589
liver metastasis		0.379	0.195-0.74	0.004	0.481	0.166-1.390	0.176
lung metastasis		1.77	0.639-4.908	0.272
peritoneal metastasis		1.288	0.504-3.294	0.597
ascites		0.663	0.265-1.659	0.38
size of of largest tumour of pancreas, cm		0.93	0.774-1.117	0.435
tumour position of pancreas	head and/or neck	1
	body and/or tail	0.686	0.365-1.29	0.242
stomach invasion		0.432	0.227-0.823	0.011	0.526	0.257-1.078	0.079
duodenum invasion		0.911	0.37-2.242	0.839
liver metastasis number	<6	1
	≥6	0.492	0.265-0.914	0.025	1.188	0.440-3.204	0.734
size of the largest tumour of liver, cm		0.772	0.641-0.930	0.006	0.899	0.701-1.151	0.398
CEA, ng/mL (log-value)		0.894	0.58-1.378	0.612
CA199, U/mL (log-value)		0.737	0.579-0.937	0.013	0.793	0.608-1.035	0.088
albumin/globin	<1.48	1
	≥1.48	2.406	1.251-4.627	0.008	1.867	0.881-3.959	0.103
ALT, U/L (log-value)		0.594	0.227-1.551	0.287
AST, U/L (log-value)		0.456	0.124-1.681	0.238
creatinine, umol/L		1.019	0.997-1.042	0.083
total bilirubin, umol/L(log-value)		2.168	0.629-7.467	0.22
direct bilirubin, umol/L (log-value）		1.296	0.516-3.255	0.581
indirect bilirubin, umol/L (log-value)		3.002	0.794-11.355	0.105
haemoglobulin, g/L（log-value）		0.179	0.001-24.383	0.493
neutrophil/lymphocyte（log-value）		0.24	0.067-0.852	0.027	1.335	0.204-8.745	0.763
platelet/lymphocyte（log-value）		0.151	0.031-0.726	0.018	0.281	0.041-1.900	0.193
WBC, 10^9/L（log-value）		0.115	0.017-0.782	0.027	0.356	0.03-4.291	0.416
HBV		0.53	0.161-1.743	0.296
Gemcitabine-based chemotherapy in 1st line		2.735	0.853-8.772	0.091
CEA: carcinoembryonic antigen; CA199: carbohydrate antigen 199; ALT: alanine transaminase; AST: aspartate transaminase; WBC: white blood cell; HBV: hepatitis B virus
